# Supplementary material for: The fungus-growing termite Macrotermes natalensis harbors bacillaene-producing Bacillus sp. that inhibit potentially antagonistic fungi
Source: PubMed Central journal article supplement (PMC3832938; doi:10.1038/srep03250), 2013-11-19
Supplement: srep03250-s1.pdf [file srep03250-s1.pdf]

**Supplementary information:**

**The fungus-growing termite *Macrotermes natalensis* harbors bacillaene-producing *Bacillus* sp. that inhibit potentially antagonistic fungi**

Soohyun Um<sup>a</sup>, Antoine Fraimout<sup>b,c</sup>, Panagiotis Sapountzis<sup>b</sup>, Dong-Chan Oh<sup>a,1</sup> and Michael Poulsen<sup>b,1</sup>

Fig. S1. Agar plate antifungal assay. 10, 20 and 50 $\mu$ L of 10 mg/mL bacillaene and DMSO control solution on each paper disk testing inhibition of the growth of *Corioloopsis* (a) , *Fusarium* (b), *Pseudoxyleria* (c), *Trichoderma* (d) and *Umbelopsis* (e)

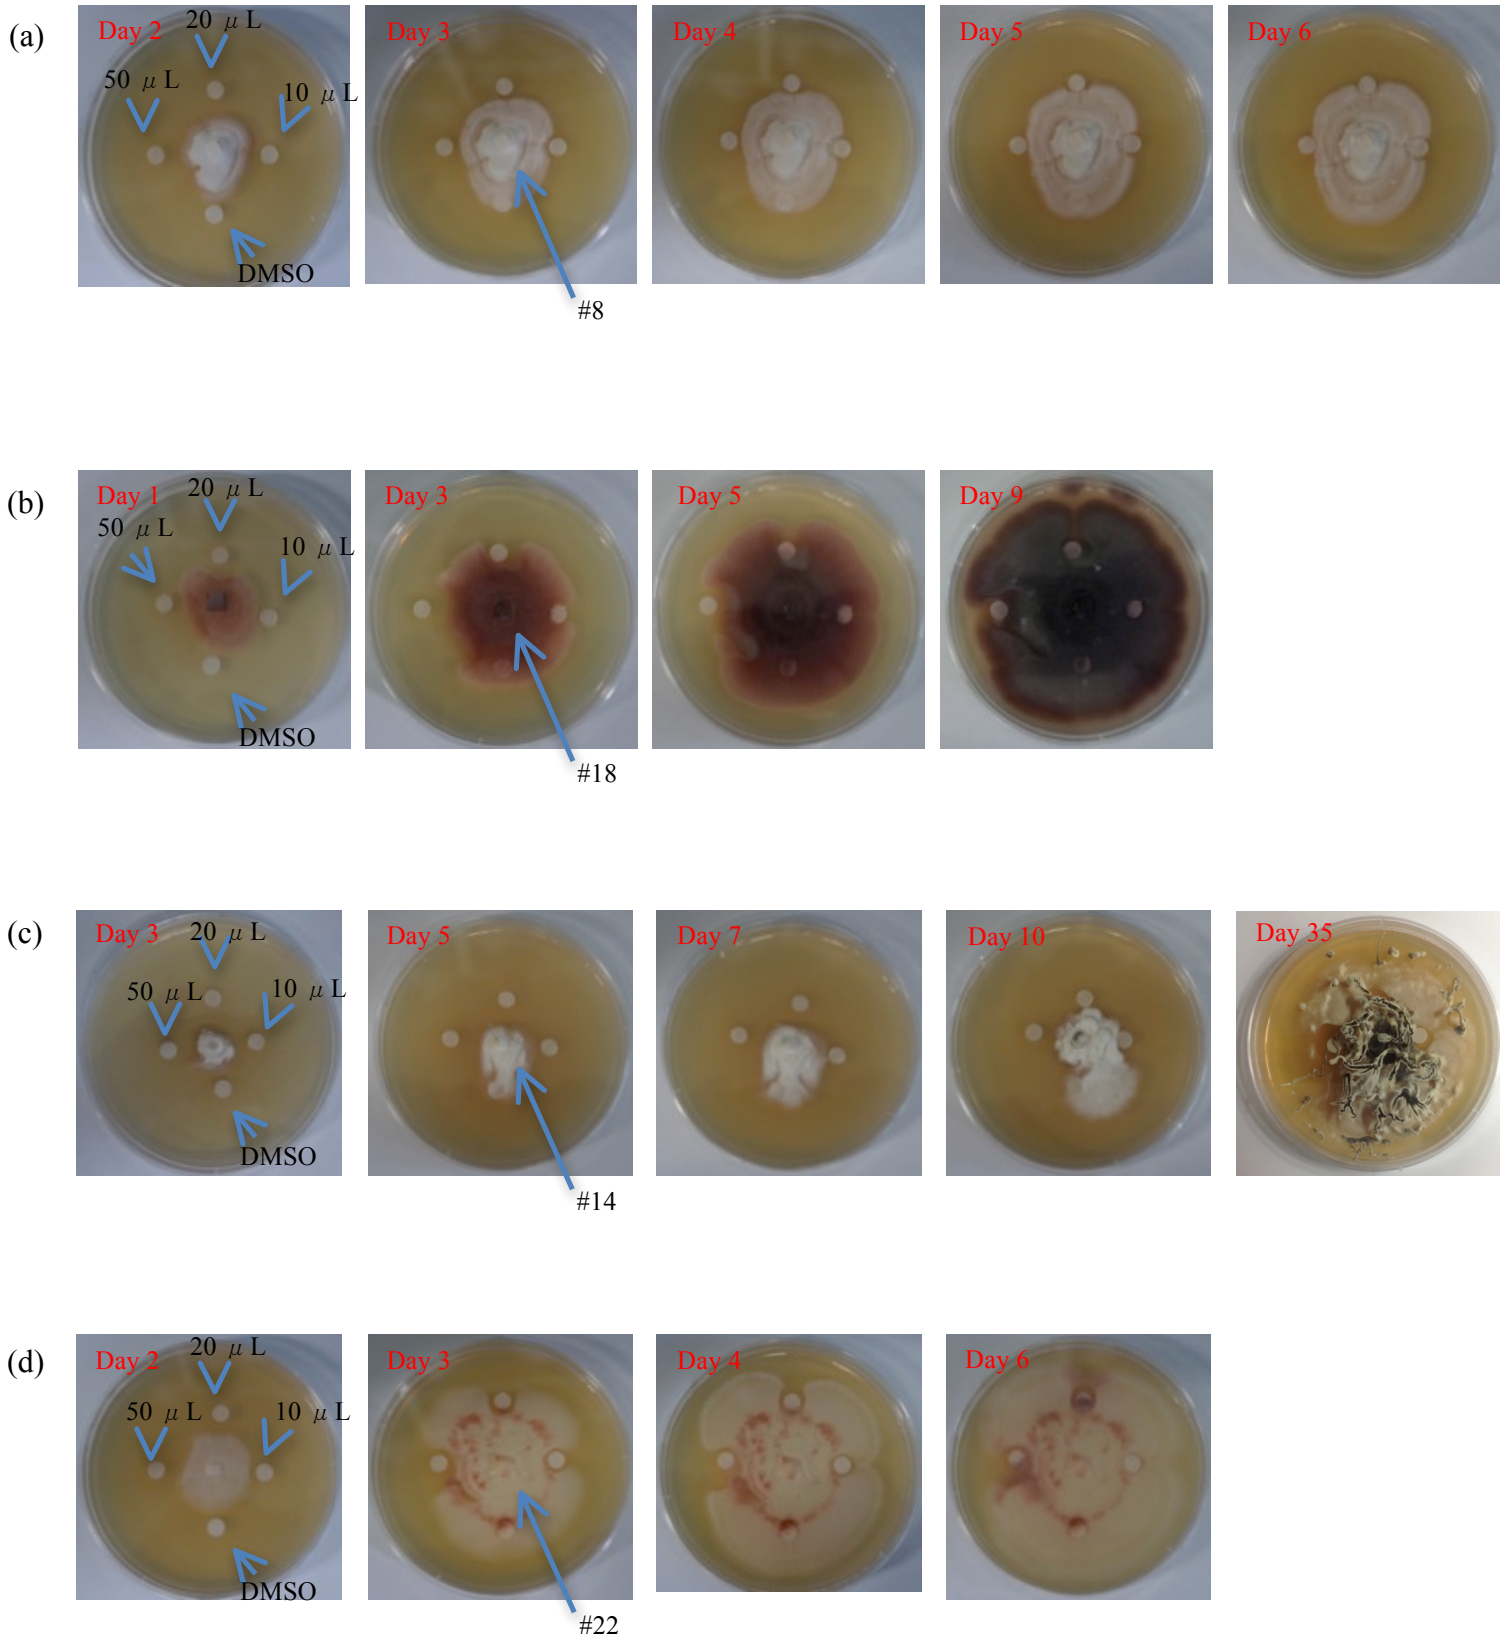

(e)

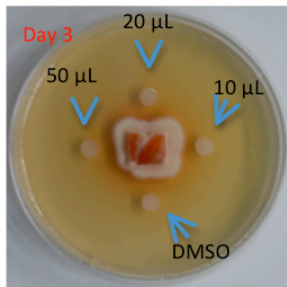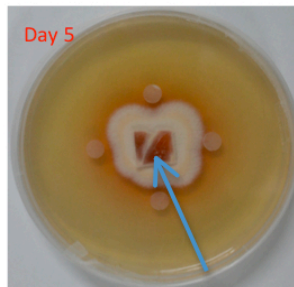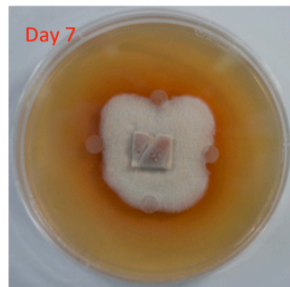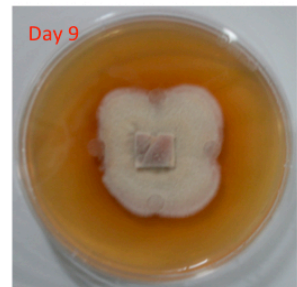

Fig. S2.  $^1\text{H}$  NMR spectrum of bacillaene (**1**) in  $\text{CD}_3\text{OD}$

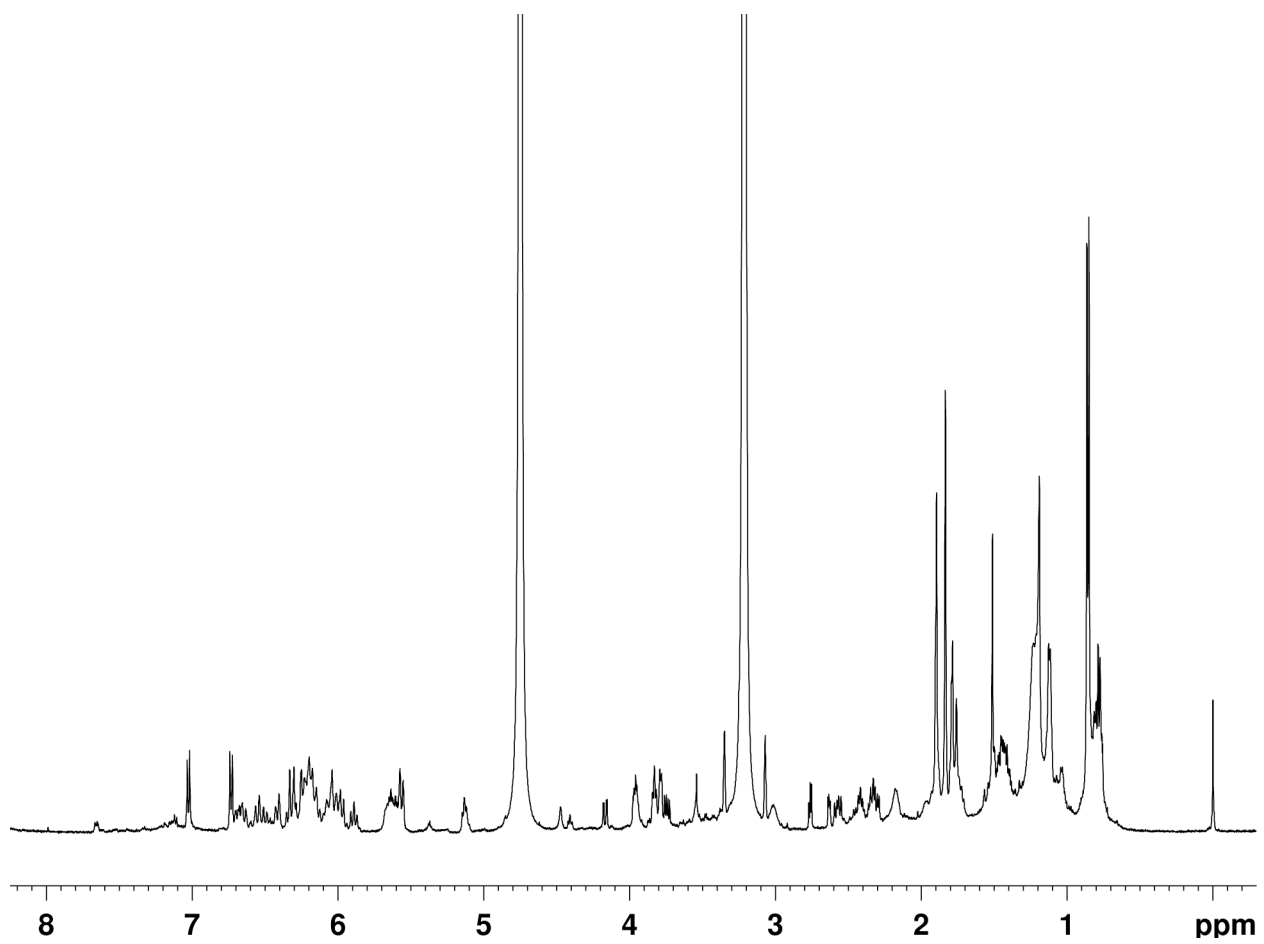

Fig. S3. COSY spectrum of bacillaene (1) in CD<sub>3</sub>OD

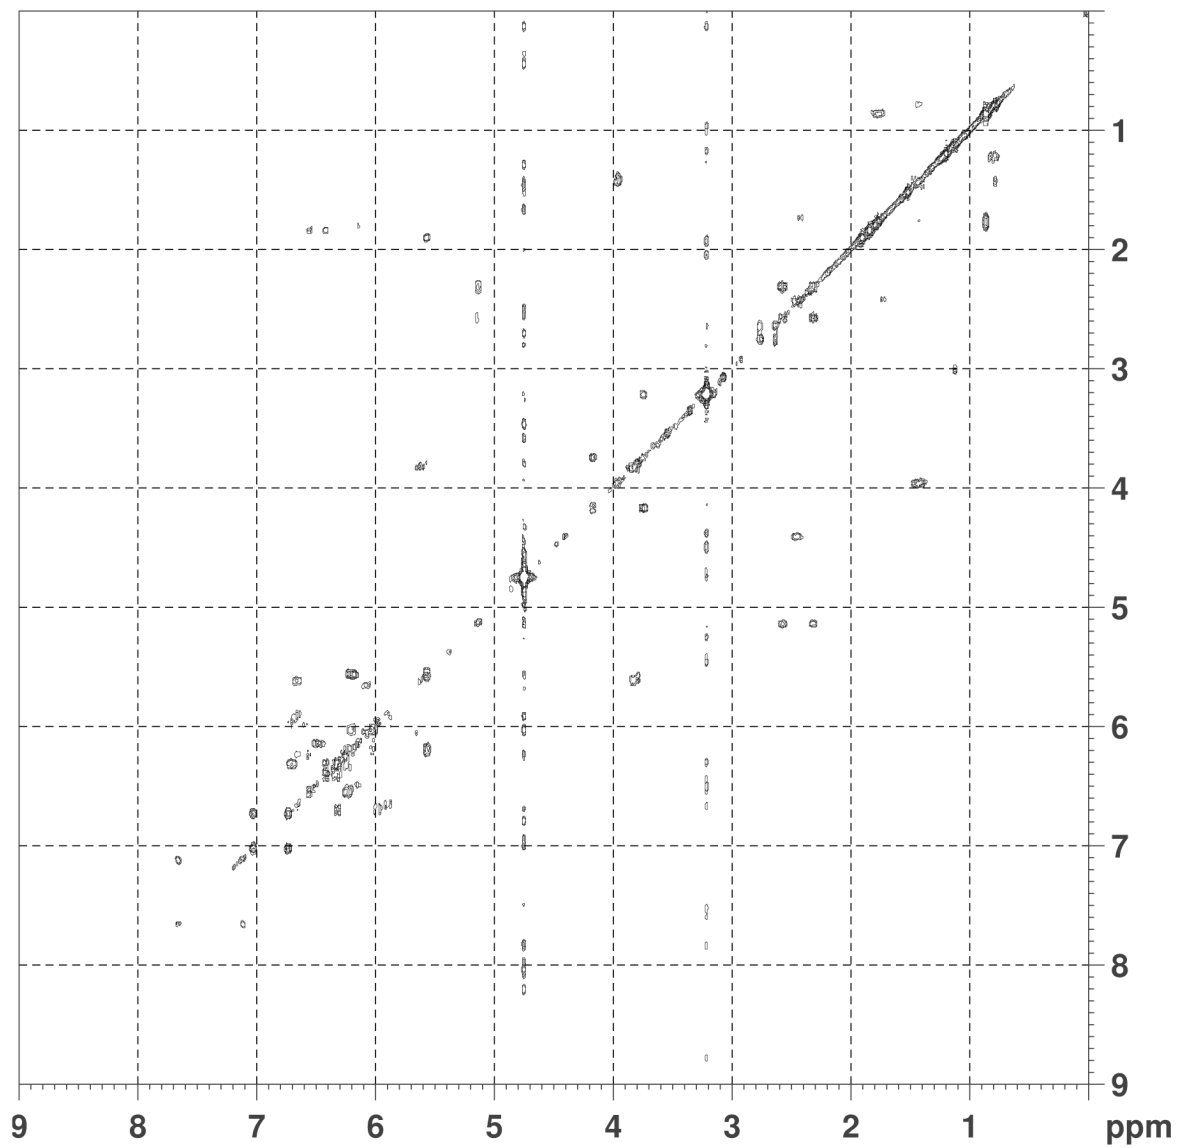

Fig. S4. HSQC spectrum of bacillaene (1) in CD<sub>3</sub>OD

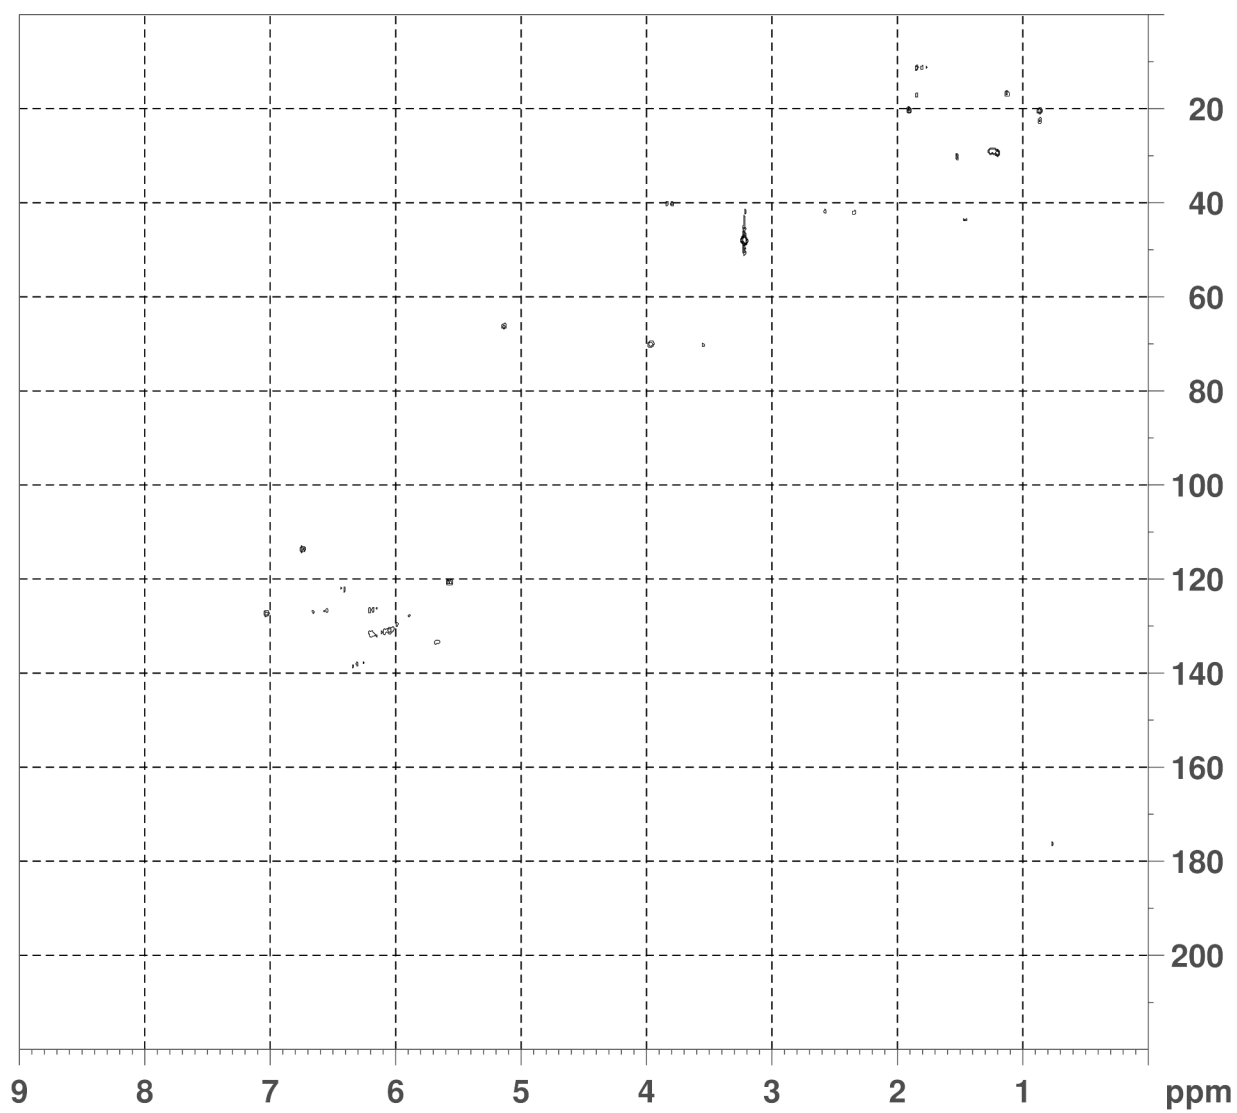

Fig. S5. HMBC spectrum of bacillaene (1) in CD<sub>3</sub>OD

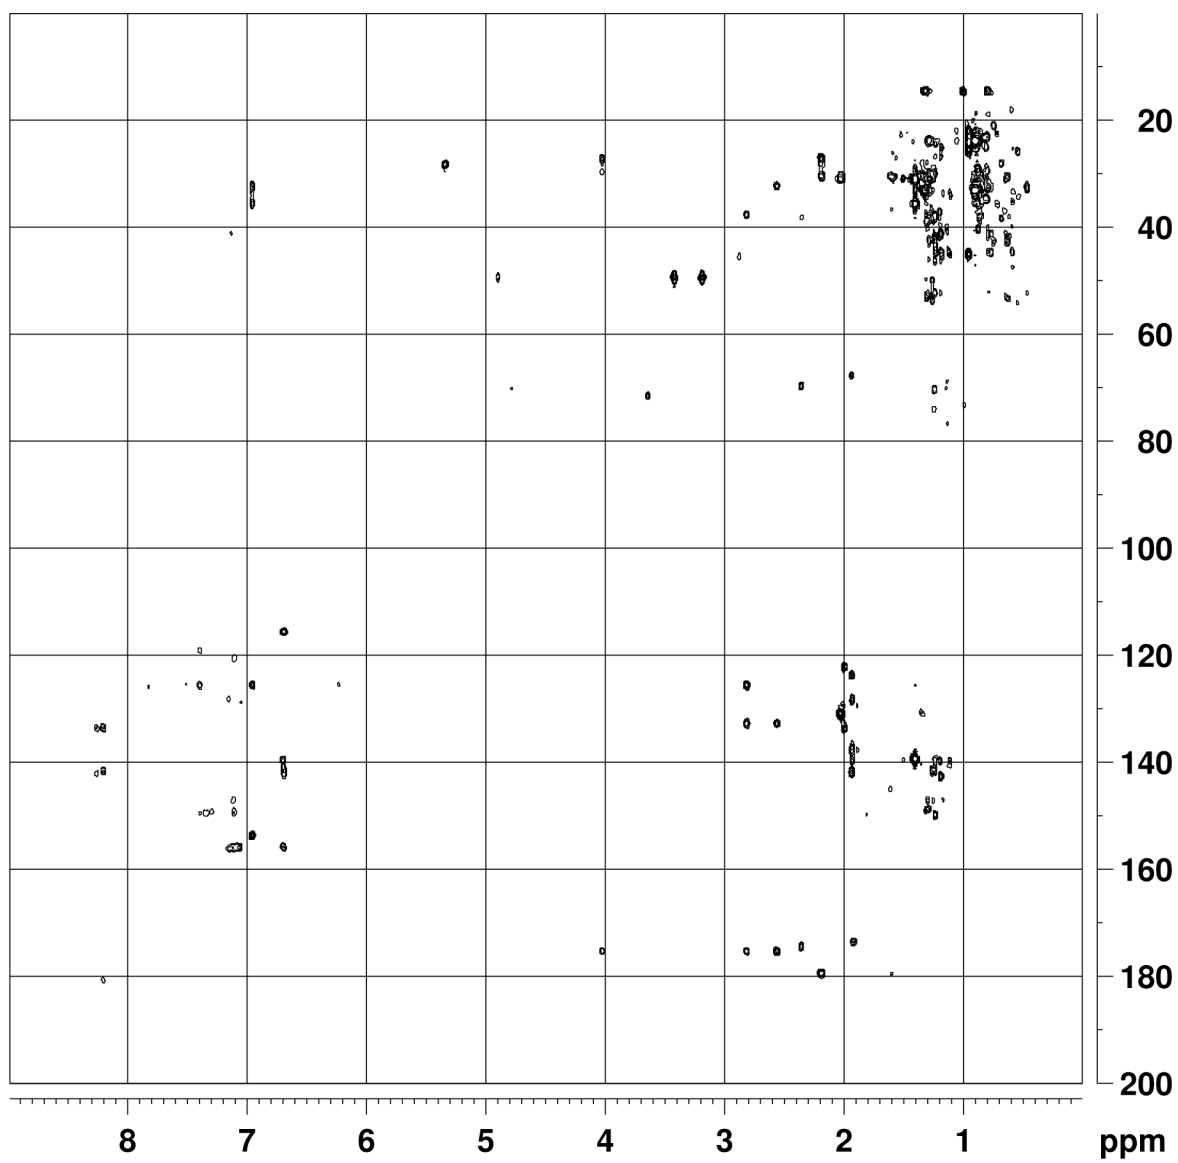

**Fig. S6.** A neighbour-joining phylogeny with Maximum Likelihood bootstrap support (1000 pseudoreplicates) based on alignment of 437bp overlapping sequences of 16S rRNA from Mathew et al. (2011) (JN000910-15; JN000919-21, JN000923, JN000926-27 and JN000929) showing the placement of *Bacillus*#9 and #11 closest to gut isolates, as well as a matrix of percentage pairwise genetic similarities between sequences.

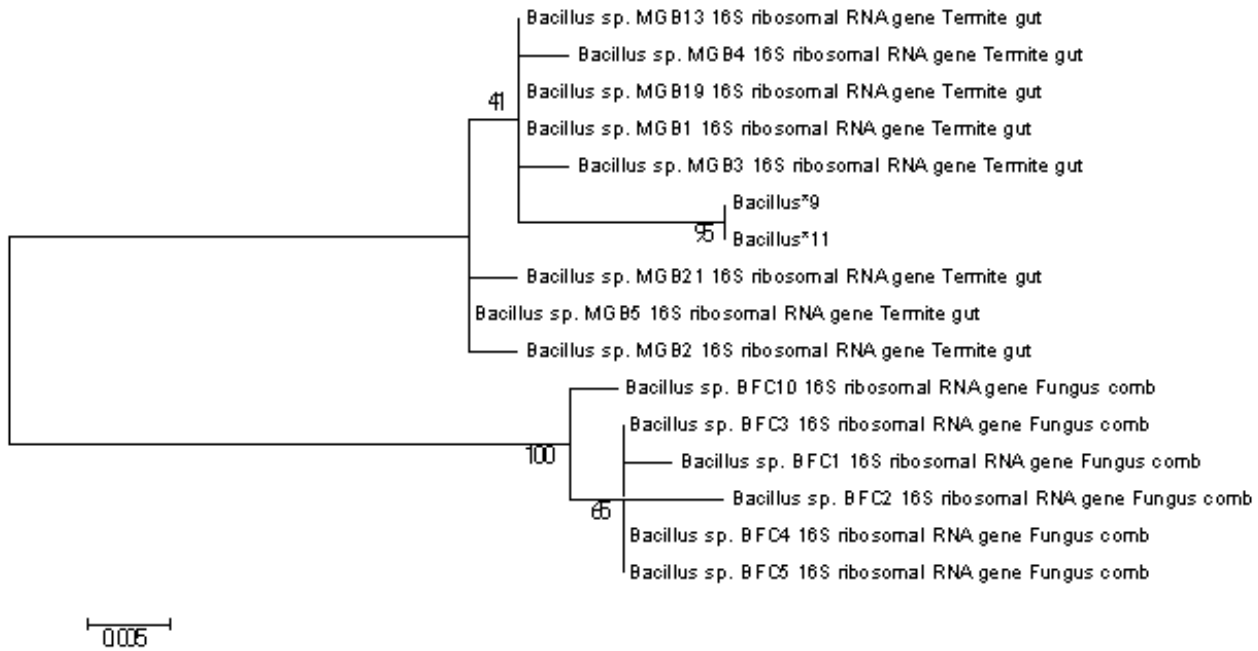

| % pairwise genetic distances   | Bacillus#9 | Bacillus#11 | Bacillus sp. MGB3 Termite gut | Bacillus sp. MGB13 Termite gut | Bacillus sp. MGB2 Termite gut | Bacillus sp. MGB19 Termite gut | Bacillus sp. MGB5 Termite gut | Bacillus sp. MGB1 Termite gut | Bacillus sp. MGB4 Termite gut | Bacillus sp. MGB21 Termite gut | Bacillus sp. BFC1 Fungus comb | Bacillus sp. BFC5 Fungus comb | Bacillus sp. BFC2 Fungus comb | Bacillus sp. BFC3 Fungus comb | Bacillus sp. BFC10 Fungus comb | Bacillus sp. BFC4 Fungus comb |
|--------------------------------|------------|-------------|-------------------------------|--------------------------------|-------------------------------|--------------------------------|-------------------------------|-------------------------------|-------------------------------|--------------------------------|-------------------------------|-------------------------------|-------------------------------|-------------------------------|--------------------------------|-------------------------------|
| Bacillus#9                     | 100.0      |             |                               |                                |                               |                                |                               |                               |                               |                                |                               |                               |                               |                               |                                |                               |
| Bacillus#11                    | 100.0      | 100.0       |                               |                                |                               |                                |                               |                               |                               |                                |                               |                               |                               |                               |                                |                               |
| Bacillus sp. MGB3 Termite gut  | 98.1       | 98.1        | 100.0                         |                                |                               |                                |                               |                               |                               |                                |                               |                               |                               |                               |                                |                               |
| Bacillus sp. MGB13 Termite gut | 98.3       | 98.3        | 99.8                          | 100.0                          |                               |                                |                               |                               |                               |                                |                               |                               |                               |                               |                                |                               |
| Bacillus sp. MGB2 Termite gut  | 98.1       | 98.1        | 99.5                          | 99.8                           | 100.0                         |                                |                               |                               |                               |                                |                               |                               |                               |                               |                                |                               |
| Bacillus sp. MGB19 Termite gut | 98.3       | 98.3        | 99.8                          | 100.0                          | 99.8                          | 100.0                          |                               |                               |                               |                                |                               |                               |                               |                               |                                |                               |
| Bacillus sp. MGB5 Termite gut  | 98.3       | 98.3        | 99.8                          | 100.0                          | 99.8                          | 100.0                          | 100.0                         |                               |                               |                                |                               |                               |                               |                               |                                |                               |
| Bacillus sp. MGB1 Termite gut  | 98.3       | 98.3        | 99.8                          | 100.0                          | 99.8                          | 100.0                          | 100.0                         | 100.0                         |                               |                                |                               |                               |                               |                               |                                |                               |
| Bacillus sp. MGB4 Termite gut  | 98.1       | 98.1        | 99.5                          | 99.8                           | 99.5                          | 99.8                           | 99.8                          | 99.8                          | 100.0                         |                                |                               |                               |                               |                               |                                |                               |
| Bacillus sp. MGB21 Termite gut | 98.1       | 98.1        | 99.5                          | 99.8                           | 99.5                          | 99.8                           | 99.8                          | 99.8                          | 99.5                          | 100.0                          |                               |                               |                               |                               |                                |                               |
| Bacillus sp. BFC1 Fungus comb  | 94.0       | 94.0        | 95.0                          | 95.0                           | 94.7                          | 95.0                           | 95.0                          | 95.0                          | 94.7                          | 94.7                           | 100.0                         |                               |                               |                               |                                |                               |
| Bacillus sp. BFC5 Fungus comb  | 94.3       | 94.3        | 95.3                          | 95.3                           | 95.0                          | 95.3                           | 95.3                          | 95.3                          | 95.0                          | 95.0                           | 99.5                          | 100.0                         |                               |                               |                                |                               |
| Bacillus sp. BFC2 Fungus comb  | 94.0       | 94.0        | 95.0                          | 95.0                           | 94.7                          | 95.0                           | 95.0                          | 95.0                          | 94.7                          | 94.7                           | 99.0                          | 99.5                          | 100.0                         |                               |                                |                               |
| Bacillus sp. BFC3 Fungus comb  | 94.5       | 94.5        | 95.4                          | 95.4                           | 95.2                          | 95.4                           | 95.4                          | 95.4                          | 95.2                          | 95.2                           | 99.5                          | 100.0                         | 99.5                          | 100.0                         |                                |                               |
| Bacillus sp. BFC10 Fungus comb | 93.5       | 93.5        | 93.8                          | 93.8                           | 93.5                          | 93.8                           | 93.8                          | 93.8                          | 93.5                          | 93.5                           | 99.4                          | 99.7                          | 99.1                          | 99.7                          | 100.0                          |                               |
| Bacillus sp. BFC4 Fungus comb  | 94.3       | 94.3        | 95.3                          | 95.3                           | 95.0                          | 95.3                           | 95.3                          | 95.3                          | 95.0                          | 95.0                           | 99.5                          | 100.0                         | 99.5                          | 100.0                         | 99.7                           | 100.0                         |



**Table S1:** BASYS gene-by-gene similarities between *Bacillus* #9, #11 and *B. subtilis* strain 168 (separate excel file: Um\_TableS1).

**Table S2:** Primers used to close gaps in the bacillaene gene cluster (separate excel file: Um\_TableS2).

**Table S3:** Pairwise Blastn and Blastp percentage similarity of the 15 *bae* genes in the bacillaene gene cluster between *Bacillus* #9 and #11 and *B. subtilis* strain 168 (separate excel file: Um\_TableS3).
